# Supplementary material
Source: Royal Society of Chemistry journal article supplement (doi:10.1039/d5ta10288j)
Supplement: d5ta10288j1.pdf [file d5ta10288j1.pdf]

ARTICLE

Supporting  
 Information

Delocalized Spin-Polarized Electrons Enhance the Performance of  
 Ion Batteries

Hui Xing<sup>1#</sup>, MingYang Wang<sup>1#</sup>, Shuchang Zhang<sup>3</sup>, Fangqi Liu<sup>2\*</sup>, Fang Lyu<sup>2</sup>, Chunmin Ning<sup>1</sup>, Chuan Xie<sup>1</sup>, Shichen Zhang<sup>1</sup>, Tingping Hou<sup>1</sup>, Sicong Zhu<sup>1\*</sup>, Rui Xiong<sup>2</sup>

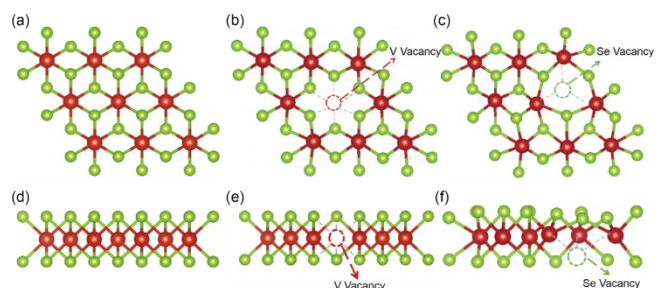

**Figure S1.** (a) (d) Top and side view of monolayer VSe<sub>2</sub>. (b) (e) Top and side view of monolayer VSVV. (c) (f) Top and side view of monolayer VSSV.

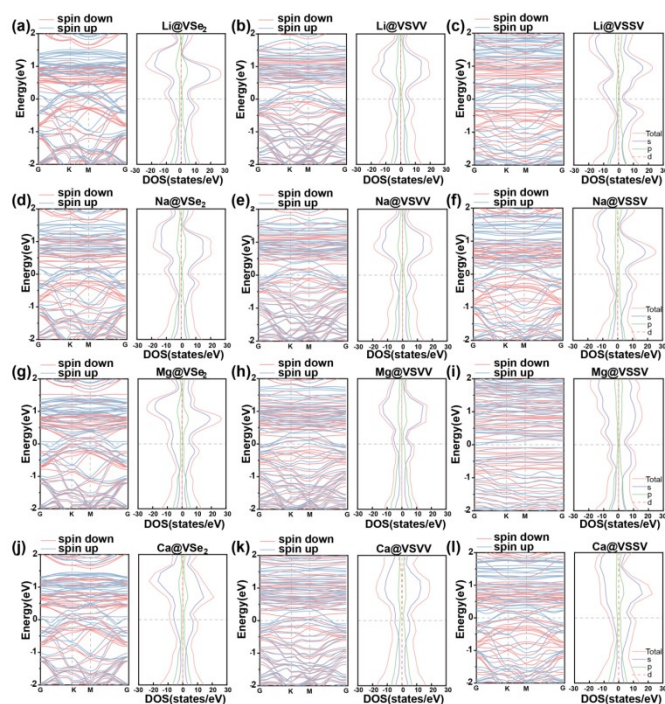

**Figure S2.** (a-c) Energy band and DOS of VSe<sub>2</sub>, VSVV, and VSSV adsorbed with Li<sup>+</sup>. (d-f) Energy band and DOS of VSe<sub>2</sub>, VSVV, and VSSV adsorbed with Mg<sup>2+</sup>. (g-i) Energy band and DOS of VSe<sub>2</sub>, VSVV, and VSSV adsorbed with Ca<sup>2+</sup>.

1 Hubei Province Key Laboratory of Systems Science in Metallurgical Process, The State Key Laboratory for Refractories and Metallurgy, Collaborative Innovation Center for Advanced Steels, International Research Institute for Steel Technology, Wuhan University of

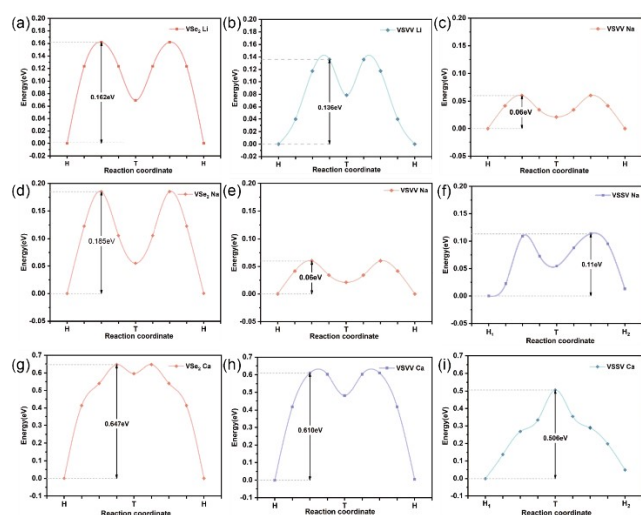

**Figure S3.** (a-c) Diffusion barriers for  $\text{Li}^+$  ions in  $\text{VSe}_2$ ,  $\text{VSVV}$ , and  $\text{VSSV}$ . (d-f) Diffusion barriers for  $\text{Na}^+$  ions in  $\text{VSe}_2$ ,  $\text{VSVV}$ , and  $\text{VSSV}$ . (g-i) Diffusion barriers for  $\text{Ca}^{2+}$  ions in  $\text{VSe}_2$ ,  $\text{VSVV}$ , and  $\text{VSSV}$ .

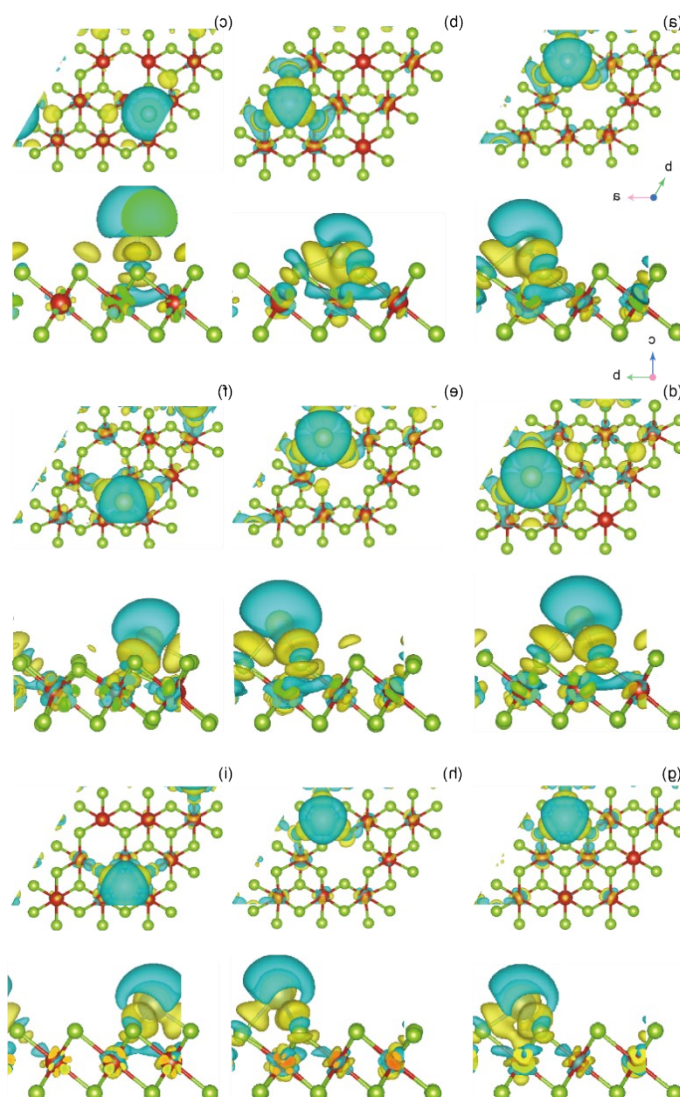

**Figure S4.** CDD of (a-o)  $\text{Li}^+$ ,  $\text{Na}^+$ , and  $\text{Ca}^{2+}$  on  $\text{VSe}_2$ ,  $\text{VSVV}$ , and  $\text{VSSV}$ . The blue and yellow regions represent the accumulation and depletion of charges. The upper level is the top view and the lower level is the side view. The isosurface level is set to  $0.001 \text{ e}/\text{\AA}^3$

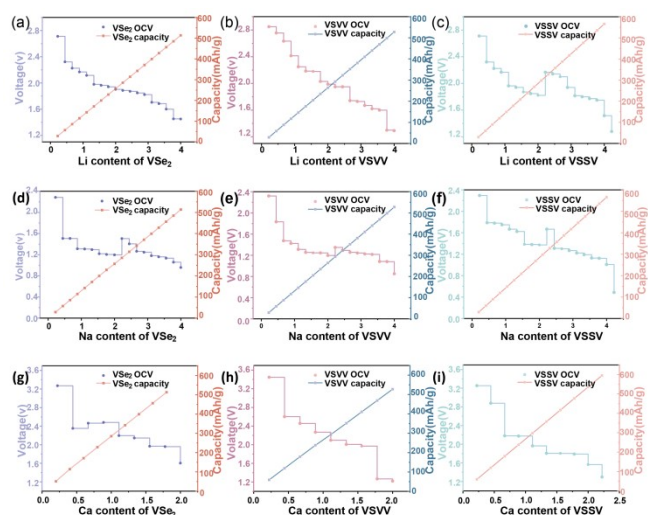

**Figure S5.** (a-c) OCV of Li<sup>+</sup> Adsorption on VSe<sub>2</sub>, VSVV, and VSSV. (d-f) OCV of Na<sup>+</sup> Adsorption on VSe<sub>2</sub>, VSVV, and VSSV. (g-i) OCV of Ca<sup>2+</sup> Adsorption on VSe<sub>2</sub>, VSVV, and VSSV.

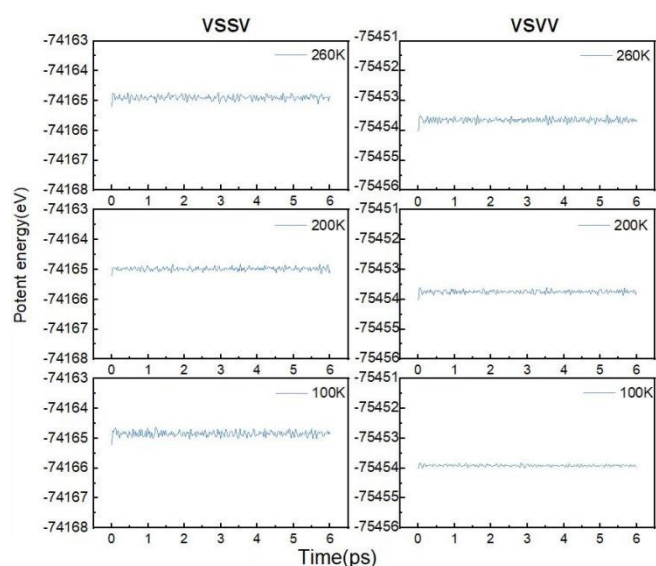

**Figure S6.** The structural stability of VSVV and VSSV evaluated by molecular dynamics simulations at 260 K, 200 K and 100 K.

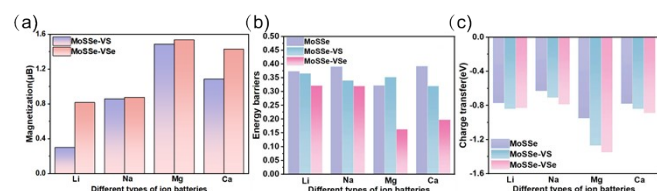

**Figure S7.** (a) Magnetic moments of S-vacancy MoSSe (MoSSe-VS) and Se-vacancy MoSSe (MoSSe-VSe); (b) Comparison of energy barriers for MoSSe-VS and MoSSe-VSe; (c) Comparison of charge transfer for MoSSe-VS and MoSSe-VSe.

**Table S1.** Stability of different metal cations adsorbed on the VSe<sub>2</sub>, VSVV, and VSSV monolayer.

|                          | Li | Na | Mg | Ca |
|--------------------------|----|----|----|----|
| VSe <sub>2</sub> H site  | √  | √  | √  | √  |
| VSe <sub>2</sub> T site  | √  | √  | √  | √  |
| VSe <sub>2</sub> T' site | ×  | ×  | ×  | ×  |
| VSe <sub>2</sub> B site  | ×  | ×  | ×  | ×  |
| VSVV H site              | √  | √  | √  | √  |
| VSVV T site              | √  | √  | √  | √  |
| VSVV T' site             | ×  | ×  | ×  | ×  |
| VSVV T'' site            | ×  | ×  | ×  | ×  |
| VSVV B site              | ×  | ×  | ×  | ×  |
| VSSV H site              | √  | √  | √  | √  |
| VSSV T site              | √  | √  | √  | √  |
| VSSV T' site             | ×  | ×  | ×  | ×  |
| VSSV B site              | ×  | ×  | ×  | ×  |

**Table S2.** Adsorption energies of different metal cations at the H and T sites on the VSe<sub>2</sub>, VSVV, and VSSV monolayer.

|                         | Li       | Na       | Mg      | Ca       |
|-------------------------|----------|----------|---------|----------|
| VSe <sub>2</sub> H site | -2.859eV | -2.228eV | -2.08eV | -1.92eV  |
| VSe <sub>2</sub> T site | -2.788eV | -2.222eV | -1.83eV | -1.32eV  |
| VSVV H site             | -2.85eV  | -2.31eV  | -2.02eV | -2.446eV |
| VSVV T site             | -2.53eV  | -2.68eV  | -1.77eV | -1.83eV  |
| VSSV H site             | -2.59eV  | -2.18eV  | -2.14eV | -1.75eV  |
| VSSV T site             | -2.71eV  | -2.29eV  | -2.35eV | -2.253   |

**Table S3.** The energy barriers, charge transfer, capacity ratios, and OCV of different types of ion batteries adsorbed on three types of materials

| Substrate material | Different types of ion batteries | Energy barriers (eV) | Charge transfer (eV) | Capacity (mAh/g) | Voltage (V)  |
|--------------------|----------------------------------|----------------------|----------------------|------------------|--------------|
| VSe <sub>2</sub>   | Li                               | 0.162                | 0.771                | 513.28           | 1.45         |
|                    | Na                               | 0.185                | 0.837                | 513.28           | 1.176        |
|                    | <b>Mg</b>                        | <b>0.457</b>         | <b>1.05</b>          | <b>1026.57</b>   | <b>1.295</b> |
|                    | Ca                               | 0.647                | 1.189                | 513.28           | 1.6          |
| VSVV               | Li                               | 0.136                | 0.863                | 527.59           | 1.292        |
|                    | Na                               | 0.12                 | 0.97                 | 527.59           | 0.85         |
|                    | <b>Mg</b>                        | <b>0.253</b>         | <b>1.25</b>          | <b>1055.19</b>   | <b>1.2</b>   |
|                    | Ca                               | 0.61                 | 1.21                 | 527.59           | 1.219        |
| VSSV               | Li                               | 0.12                 | 0.95                 | 565.54           | 1.279        |
|                    | Na                               | 0.11                 | 0.98                 | 565.54           | 0.686        |
|                    | <b>Mg</b>                        | <b>0.218</b>         | <b>1.44</b>          | <b>1131.1</b>    | <b>0.898</b> |
|                    | Ca                               | 0.506                | 1.28                 | 593.52           | 1.297        |

**Table S4.** For VSe<sub>2</sub>, VSVV, and VSSV batteries, after the introduction of vacancies, the percentage decreases in their ion diffusion energy barriers and OCV, as well as the percentage increases in their transferred charges and theoretical capacities.

|                    |                                  | The percentage of performance improvement compared with VSe <sub>2</sub> |                 |             |              | 2D Material                                     | Open-Circuit Voltage (V) | Energy Barrier (eV) | Reference |
|--------------------|----------------------------------|--------------------------------------------------------------------------|-----------------|-------------|--------------|-------------------------------------------------|--------------------------|---------------------|-----------|
| Substrate material | Different types of ion batteries | Energy barriers                                                          | Charge transfer | Capacity    | Voltage      |                                                 |                          |                     |           |
| VSVV               | Li                               | 25.9%                                                                    | 12%             | 2.8%        | 10.8%        | Li <sup>+</sup> @VSSV                           | 0.95                     | 0.12                | -         |
|                    | Na                               | 35%                                                                      | 15.8%           | 2.8%        | 27.7%        | ScTe <sub>2</sub> monolayer                     | 1.04                     | 0.32                | [1]       |
|                    | <b>Mg</b>                        | <b>44.6%</b>                                                             | <b>19%</b>      | <b>2.8%</b> | <b>7%</b>    | 1T-ZrSe <sub>2</sub> monolayer                  | 0.76                     | 0.22                | [2]       |
|                    | Ca                               | 5.7%                                                                     | 1.7%            | 2.8%        | 23.8%        | Dumbbell silicene                               | 0.38                     | 0.19                | [3]       |
|                    | Li                               | 16%                                                                      | 23.2%           | 10%         | 11.8%        | Li <sup>+</sup> Mn <sub>2</sub> NO <sub>2</sub> | 2.82                     | 0.28                | [4]       |
| VSSV               | Na                               | 40%                                                                      | 17%             | 10%         | 41.7%        |                                                 |                          |                     |           |
|                    | <b>Mg</b>                        | <b>52.3%</b>                                                             | <b>37%</b>      | <b>10%</b>  | <b>30.6%</b> |                                                 |                          |                     |           |
|                    | Ca                               | 21.8%                                                                    | 7.6%            | 15.6%       | 18.9%        |                                                 |                          |                     |           |

### Notes and references

- [1] T. Dey, S. Chowdhury, S. G. Kang, P. Sen, B. C. Gupta and J. C. Mahato, *Comput. Mater. Sci.*, 2025, 253.
- [2] M. Muntasir, A. S. Mahmud, A. F. Eram and Q. D. M. Khosru, presented in part at the 2025 IEEE 25th International Conference on Nanotechnology (NANO), 2025.
- [3] D. D. Vargas, G. L. Cardoso, P. C. Piquini, R. Ahuja and R. J. Baierle, *ACS Appl. Mater. Interfaces*, 2022, 14, 47262–47271.
- [4] P. Gong, X. Zhang, F. Liu, K. Yao and S. Zhu, *Surfaces and Interfaces*, 2022, 32.

**Table S5.** Comparison of Key Performance Indicators Between VSe<sub>2</sub> with Selenium Vacancies (VSSV) and Reported Two-Dimensional Energy-Storage Materials.
